# Supplementary material for: The first characterization of multidrug and toxin extrusion (MATE/SLC47) proteins in zebrafish (Danio rerio)
Source: PubMed Central journal article supplement (PMC4928094; doi:10.1038/srep28937), 2016-06-30
Supplement: srep28937-s1.pdf [file srep28937-s1.pdf]

## Supplementary material

### The first characterization of multidrug and toxin extrusion (MATE/SLC47) proteins in zebrafish (*Danio rerio*)

Jovica Lončar<sup>1‡</sup>, Marta Popović<sup>1, 3‡</sup>, Petra Krznar<sup>4</sup>, Roko Zaja<sup>1, 2</sup>, Tvrtko Smital<sup>1\*</sup>

<sup>1</sup>Laboratory for Molecular Ecotoxicology, Division for Marine and Environmental Research, Ruđer Bošković Institute, Zagreb, Croatia

<sup>2</sup>Sir William Dunn School of Pathology, University of Oxford, Oxford, England, United Kingdom

<sup>3</sup>Oxford Institute for Radiation Oncology, University of Oxford, Oxford, England, United Kingdom

<sup>4</sup>Institute of Molecular Systems Biology, ETH, Zurich, Switzerland

\* Corresponding author: [smital@irb.hr](mailto:smital@irb.hr)

‡ These authors contributed equally to this work.

**Table S1.** Primer sequences used for relative quantification of zebrafish *mates* using qRT-PCR analysis.

| Protein name | Primer sequence 5→3          | Final conc.(nM) | Slope | Intercept | Efficiency[%] |
|--------------|------------------------------|-----------------|-------|-----------|---------------|
| DrMate3      | F TCGGATGTACCAAAGATGT        | 300             | -3.69 | 35.1      | 86.7          |
|              | R CGGTAATGCCCGCTATGG         | 300             |       |           |               |
| DrMate4      | F GCAGCACAGGAGAACACTGA       | 300             | -3.23 | 34.6      | 104           |
|              | R CCAACTGTGACCAATGCAAC       | 300             |       |           |               |
| DrMate5      | F GGCTGTGATGTGAATGATGC       | 300             | -3.04 | 27.4      | 113           |
|              | R GGCGCAGCACTAAAACACTC       | 300             |       |           |               |
| DrMate6      | F TCACGCTGTACGTTTTCTG        | 300             | -3.35 | 31.6      | 98.8          |
|              | R AACTGCTGCAATCTTCTGC        | 300             |       |           |               |
| DrMate7      | F CTCAGGATCAGGACGAGAGG       | 300             | -3.22 | 26.4      | 105           |
|              | R CTGAGTGGTGGACAGCAGAA       | 300             |       |           |               |
| DrMate8      | F TCTGCAATGACAGCTCCTGATAGTAT | 300             | -3.44 | 38.8      | 95.3          |
|              | R GGCTCCACGTTCCGGATCG        | 300             |       |           |               |
| EF1 $\alpha$ | F CCTGGGAGTGAAACAGCTGATC     | 300             | -3.43 | 42.5      | 95.5          |
|              | R GCTGACTTCCTGGTGATTCC       | 300             |       |           |               |

**Table S2.** Primers used for cloning of zebrafish *mates*. Primer sequences, restriction enzyme sites introduced in the primer sequences (bold letters), and  $T_m$  values are shown.

| Gene name | Primer sequence 5 -> 3                     | Restriction enzymes | $T_m$ [°C] |
|-----------|--------------------------------------------|---------------------|------------|
| Mate3     | F TTAGCTAGCGAATTCATGGACAGTATTACCAGTTACAA   | NheI-EcoRI          | 57         |
|           | R TTAGCGGCCGCGGTACCTCATCTAAGATATCTAACAAGCA | NotI-KpnI           | 55         |
| Mate4     | F TTAGCTAGCGAATTCATGGAAATGAACAGTATTCATAC   | NheI-EcoRI          | 57         |
|           | R TTAGCGGCCGCGGTACCTCAAATAACAAATCTAATCAGCA | NotI-KpnI           | 58         |
| Mate5     | F TTAGCTAGCGAATTCATGAACGAAAGAATGAACGAAG    | NheI-EcoRI          | 62         |
|           | R TTAGCGGCCGCGGTACCTCATCTTTAAGACTGTACTTGA  | NotI-KpnI           | 55         |
| Mate6     | F TTAGCTAGCGAATTCATGCCTGAGGCTGGCG          | NheI-EcoRI          | 67         |
|           | R TTAGGTACCTCTAGATTAGCTCATTGTAATATTGAGAA   | KpnI-XbaI           | 55         |
| Mate7     | F TTAAAGCTTGAATTCATGGACGTCTCCAGTCCTGG      | HindIII-EcoRI       | 67         |
|           | R TTAGCGGCCGCCGGGTCAAATGAAACTCGTTGAATAGA   | NotI-SmaI           | 61         |
| Mate8     | F TTAGCTAGCGAATTCATGGACGTTTCAAGTCCCAC      | NheI-EcoRI          | 64         |
|           | R TTAGGTACCTCTAGATTATAATGACGCAGAAGTGAAT    | KpnI-XbaI           | 62         |

**Table S3.** Protein annotation and accession numbers of protein sequences used in the phylogenetic analysis of MATE superfamily (Multidrug Extrusion; gene name *SLC47A*) in metazoa. Species abbreviations: Hs, *Homo sapiens*; Mm, *Mus musculus*; Rn, *Rattus norvegicus*; Gg, *Gallus gallus*; Tg, *Taeniopygia guttata*; Xt, *Xenopus tropicalis*; Ac, *Anolis carolinensis*; Lc, *Latimeria chalumnae*; Dr, *Danio rerio*; Ga, *Gasterosteus aculeatus*; Gm, *Gadus morhua*; Ol, *Oryzias latipes*; Tr, *Takifugu rubripes*; Bf, *Branchiostoma floridae*; Sk, *Saccoglossus kowalevskii*; Lg, *Lottia gigantea*; Ct, *Capitella teleta*; Nv, *Nematostella vectensis*; Aq, *Amphimedon queenslandica*; Ta, *Trichoplax adhaerens*; Mb, *Monosiga brevicollis*; Sc, *Saccharomyces cerevisiae*; Ec, *Escherichia coli*; Vc, *Vibrio cholera*. Protein sequences with accession numbers starting with 'NP', 'XP', 'YP' or 'WP' were retrieved from NCBI database; the ones starting with 'ENS' or 'PAC' were retrieved from ENSEMBL database; and protein IDs in number format were retrieved from JGI database.

| Protein annotation | Accession number   | Length (aa) |
|--------------------|--------------------|-------------|
| HsMATE1            | NP_060712.2        | 570         |
| HsMATE2            | NP_690872.2        | 602         |
| HsMATE2-K          | NP_001093116.1     | 566         |
| HsMATE2-B          | BAF37007.1         | 219         |
| HsMATE2_tv3        | NP_001243592.1     | 580         |
| MmMate1a           | AAH31436           | 532         |
| MmMate1b           | NP_080459.2        | 567         |
| MmMate2            | NP_001028714.1     | 573         |
| RnMate1            | NP_001014140.1     | 566         |
| RnMate2            | NP_001178849.1     | 572         |
| GgMate1            | NP_001129151.1     | 579         |
| GgMate2            | NP_001025891.2     | 475         |
| TgMate1            | XP_012424121.1     | 536         |
| TgMate2            | XP_012424122.1     | 622         |
| AcMate1            | XP_008123627.1     | 527         |
| AcMate2            | XP_003229800.2     | 373         |
| XtMate1            | NP_001096440.1     | 574         |
| XtMate2            | XP_012812968.1     | 600         |
| XtMatelike1        | XP_002934402.2     | 562         |
| XtMatelike2        | XP_002933880.2     | 550         |
| XtMatelike3        | XP_012813618.1     | 565         |
| LcMate1            | ENSLACP00000003119 | 575         |
| LcMate2            | ENSLACP00000001877 | 494         |
| <b>DrMate3</b>     | NP_001073648.1     | 590         |
| <b>DrMate4</b>     | NP_001274473.1     | 586         |
| <b>DrMate5</b>     | XP_005157715.1     | 548         |
| <b>DrMate6</b>     | NP_001014332.2     | 629         |
| <b>DrMate7</b>     | NP_001289183.1     | 607         |
| <b>DrMate8</b>     | XP_003201757.2     | 588         |
| GaMate3            | ENSGACP00000027262 | 566         |
| GaMate4            | ENSGACP00000024450 | 563         |
| GaMate5            | ENSGACP00000014451 | 497         |
| GaMate6            | ENSGACP00000027266 | 577         |
| GaMate7            | ENSGACP00000014470 | 530         |
| GmMate3            | ENSGMOP00000015086 | 454         |
| GmMate5            | ENSGMOP00000011176 | 458         |
| GmMate6            | ENSGMOP00000012623 | 283         |
| OlMate4            | ENSORLP00000002448 | 569         |
| OlMate5            | ENSORLP00000006032 | 566         |
| OlMate6            | ENSORLP00000006776 | 567         |
| OlMate7            | ENSORLP00000006011 | 440         |
| OlMate8            | ENSORLP00000005994 | 576         |
| TrMate3            | ENSTRUP00000002595 | 469         |
| TrMate4            | ENSTRUP00000011208 | 580         |
| TrMate5            | ENSTRUP00000007545 | 524         |
| TrMate6a           | ENSTRUP00000000290 | 570         |
| TrMate6b           | ENSTRUP00000003131 | 560         |
| BfMatelike1        | XP_002605941.1     | 715         |
| BfMatelike2        | 183877             | 431         |
| SkMatelike1        | XP_002737051.1     | 647         |
| SkMatelike2        | XP_002737052.1     | 622         |
| SkMatelike3        | XP_006820737.1     | 553         |
| LgMatelike1        | XP_009051070.1     | 659         |
| NvMatelike1        | XP_001638537       | 408         |
| CtMatelike1        | 164649             | 427         |
| CtMatelike2        | ELU15421.1         | 612         |
| TaMatelike1        | XP_002108992       | 533         |
| ScMatelike1        | NP_011897.1        | 581         |
| ScMatelike2        | NP_010625.1        | 695         |
| AqMatelike1        | XP_003383317.1     | 671         |
| MbMatelike1        | XP_001744290       | 446         |
| EcNorM             | YP_025307.1        | 457         |
| VcNorM             | AAF94694.1         | 461         |

Figure S1.

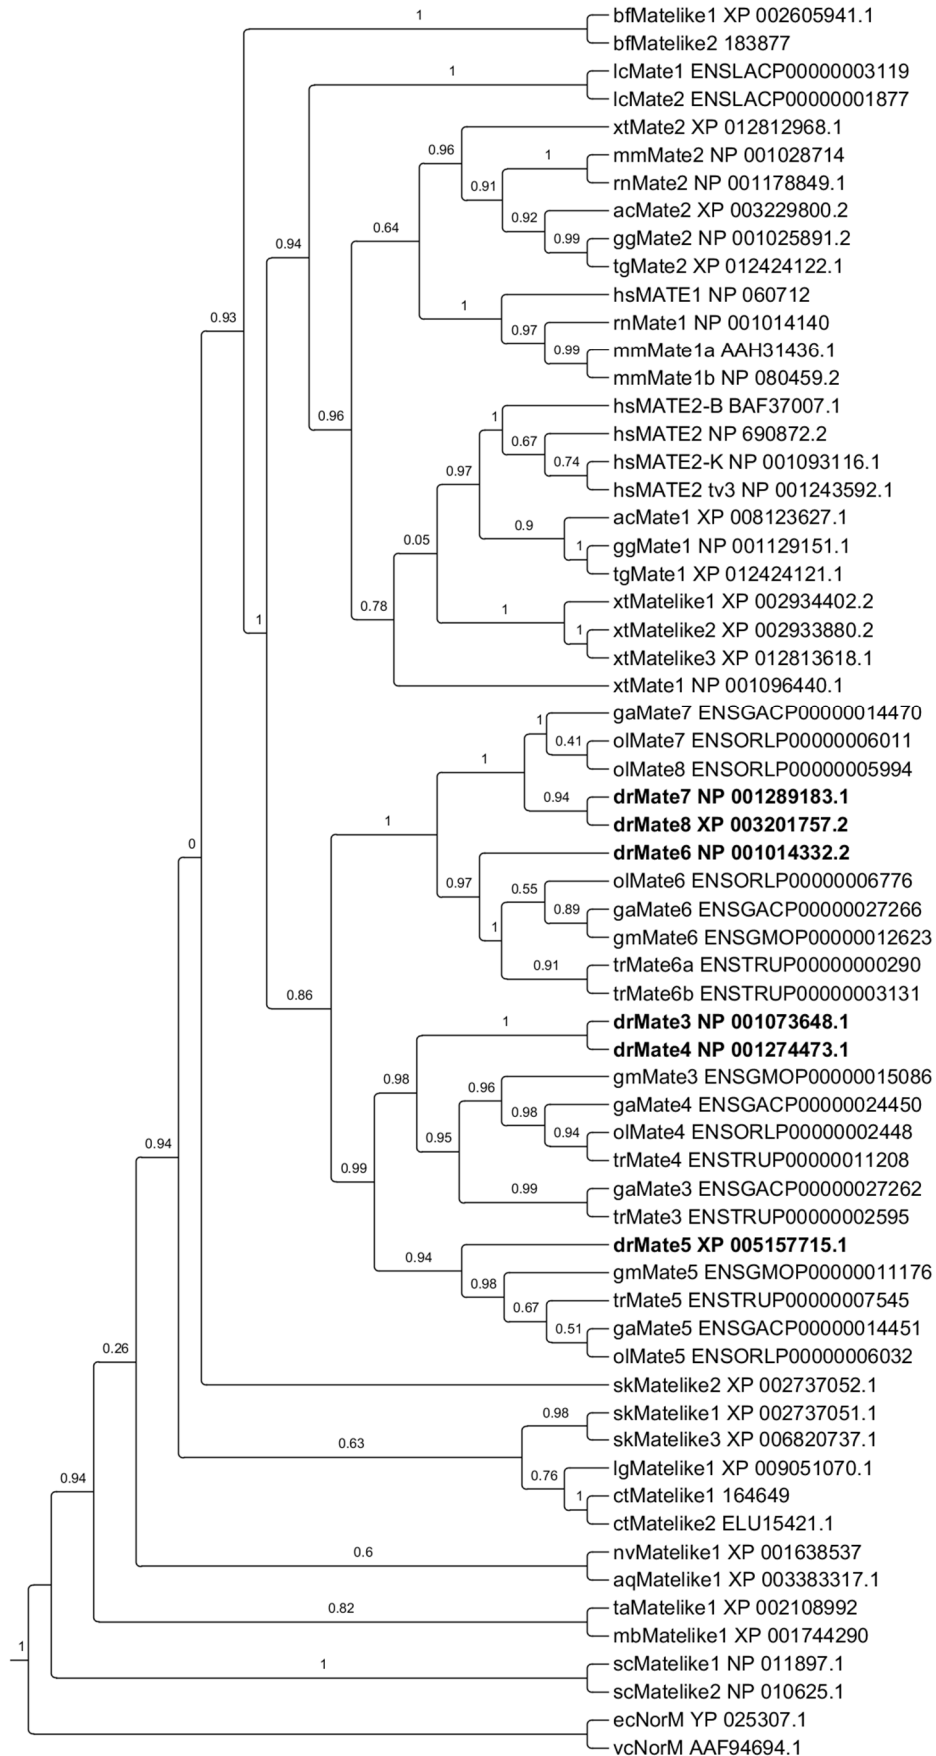

**Figure S1.** Phylogenetic analysis of MATE/Mate family (Multidrug and toxin extrusion). Phylogenetic tree was constructed with maximum likelihood method. Branch support is estimated with the approximate likelihood ratio test (aLRT). SLC22 gene family was used as an outgroup (not shown in the tree). Species abbreviations: Hs, *Homo sapiens*; Rn, *Rattus norvegicus*; Mm, *Mus musculus*; Gg, *Gallus gallus*; Tg, *Taeniopygia guttata*; Ac, *Anolis carolinensis*; Xt, *Xenopus tropicalis*; Dr, *Danio rerio*; Tn, *Tetraodon nigroviridis*; Tr, *Takifugu rubripes*; Ga, *Gasterosteus aculeatus*; Ol, *Oryzias latipes*; Gm, *Gadus morhua*; Lc, *Latimeria chalumnae*; Le, *Leucoraja erinacea*; Bf, *Branchiostoma floridae*; Pm, *Petromyzon marinus*; Od, *Oikopleura dioica*; Ci, *Ciona intestinalis*; Sk, *Saccoglossus kowalevskii*; Sp, *Strongylocentrotus purpuratus*; Ct, *Capitella teleta*; Nv, *Nematostella vectensis*; Aq, *Amphimedon queenslandica*; Ta, *Trichoplax adhaerens*; Mb, *Monosiga brevicollis*; Sc, *Saccharomyces cerevisiae*; Ec, *Escherichia coli*; Vc, *Vibrio cholera*.

**Figure S2.**

**A. liver**

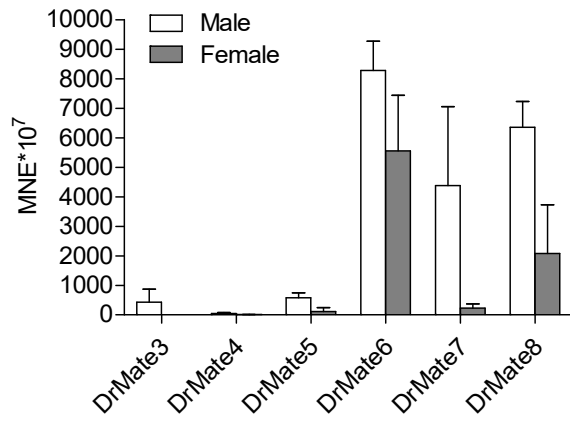

**B. kidney**

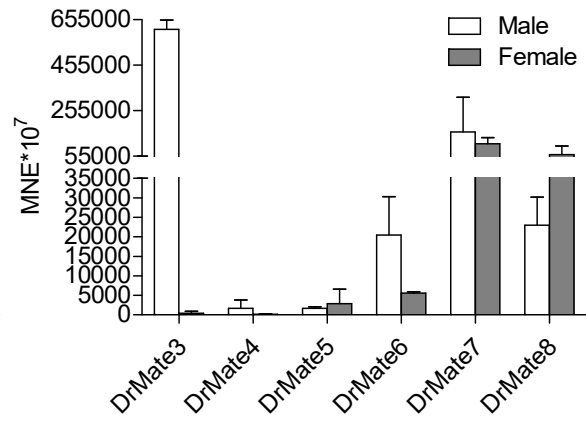

**C. intestine**

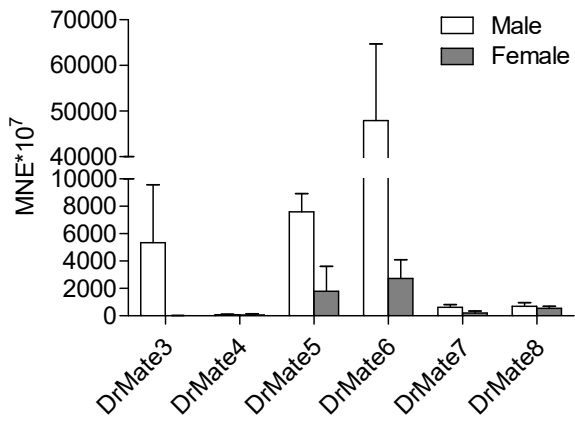

**D. gills**

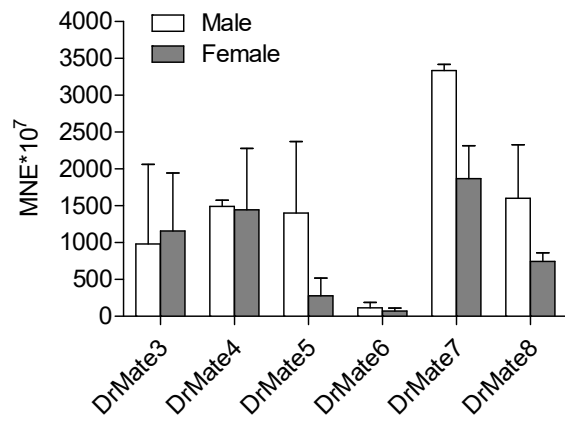

**E. brain**

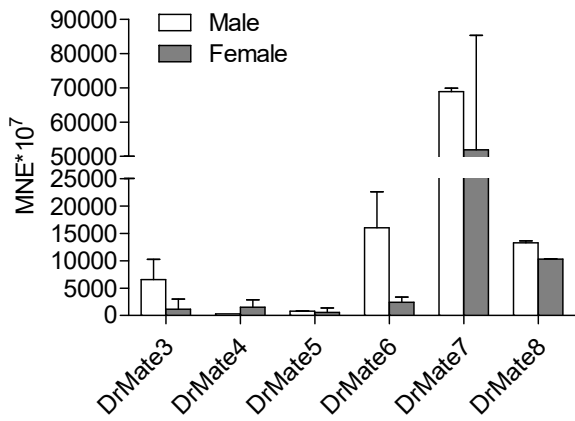

**F. gonads**

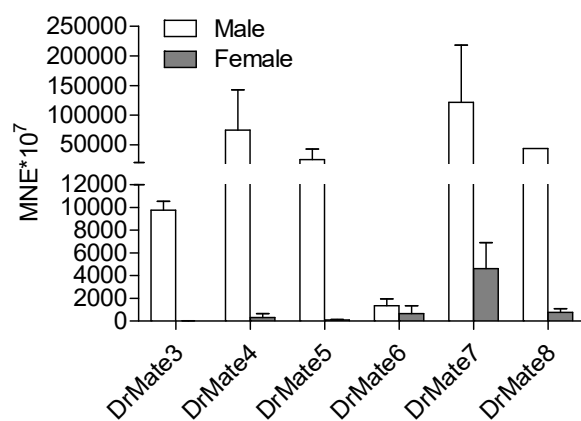

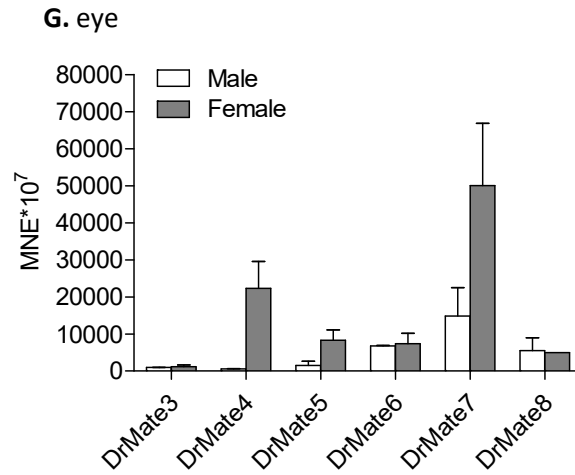

**Figure S2.** Tissue expression pattern of zebrafish *mate* genes: **A**, liver; **B**, kidney; **C**, intestine; **D**, gills; **E**, brain; **F**, gonads; and **G**, eye in female and male zebrafish, quantified with qRT-PCR. Results of two to three independent experiments for females and males (two to three pools of five individuals) are given, while the kidney expression data results are from two pools of 15 individuals. Data represent MNE (mean normalized expression)  $\pm$  SE normalized to the Ef1 $\alpha$ .

Figure S3.

A. Mate3

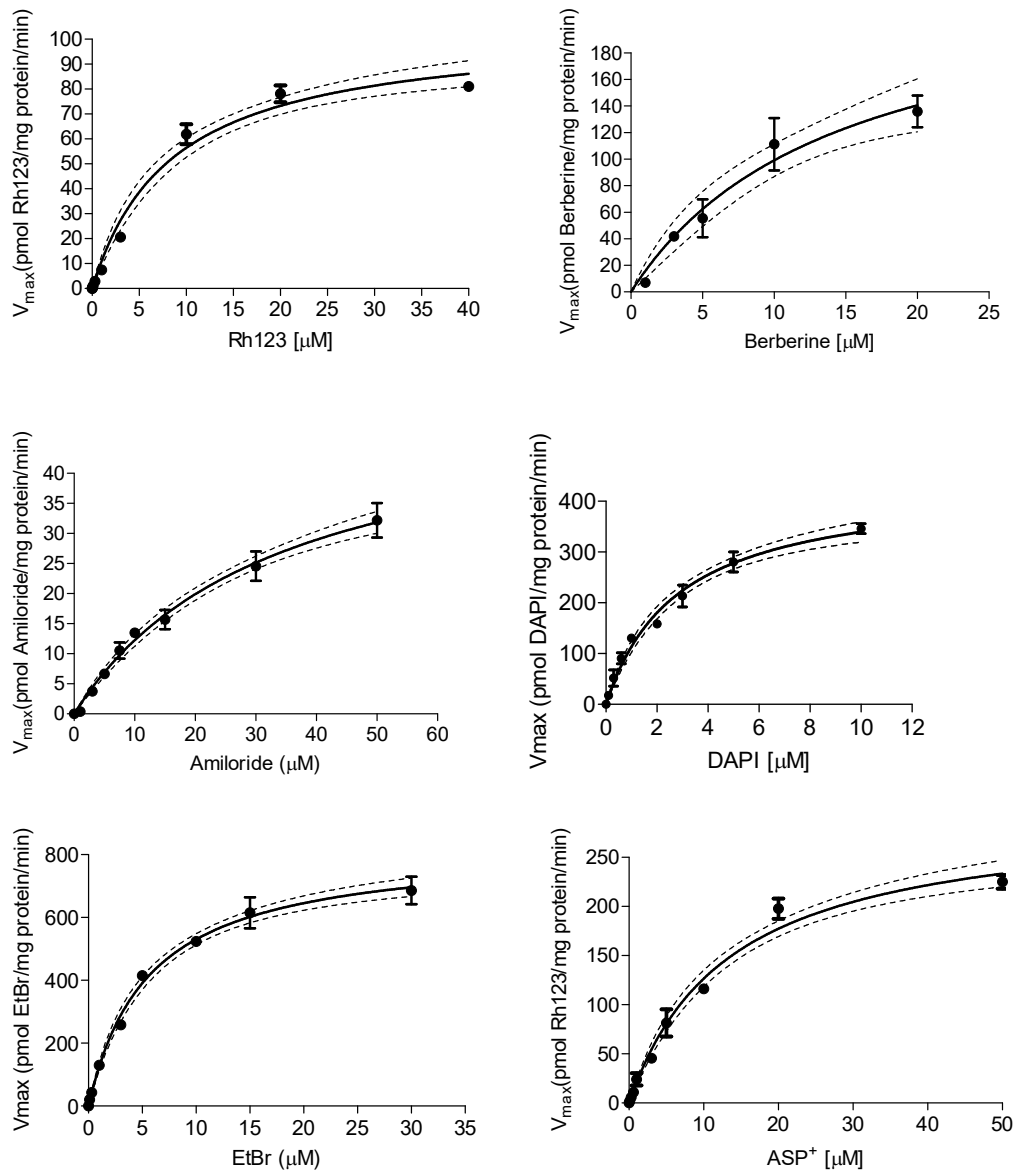



B. Mate4

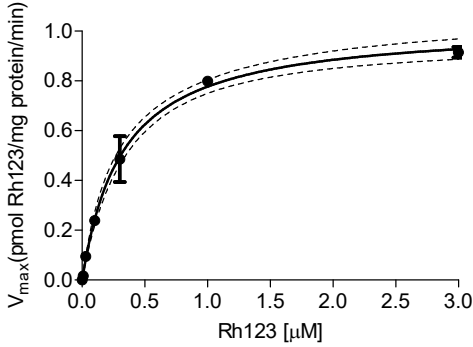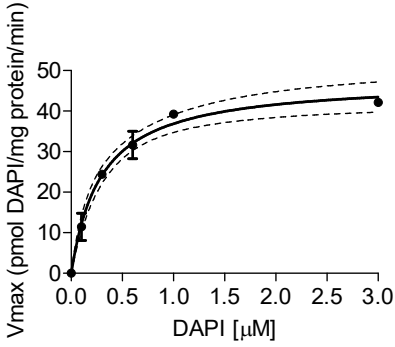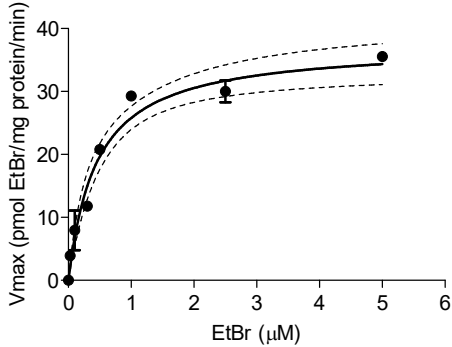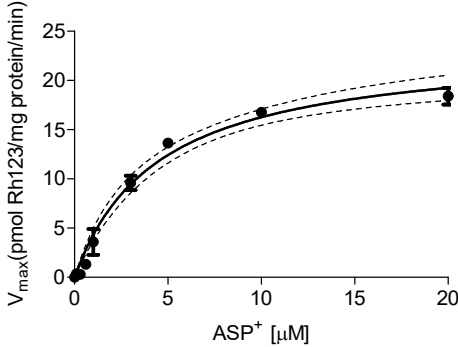

### C. Mate6

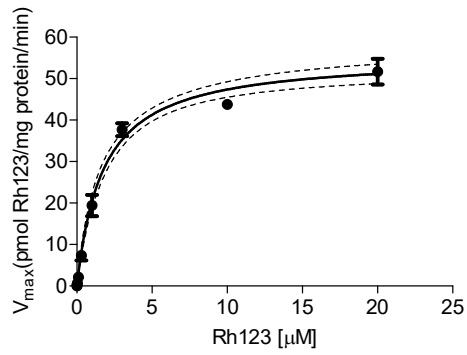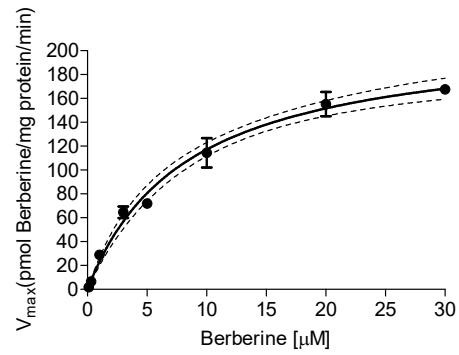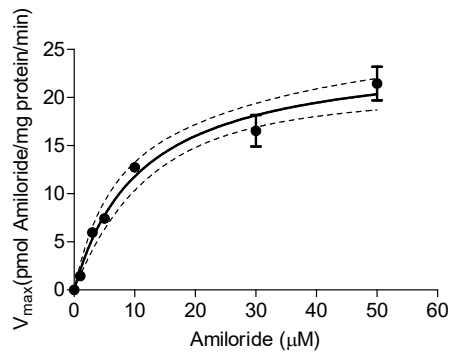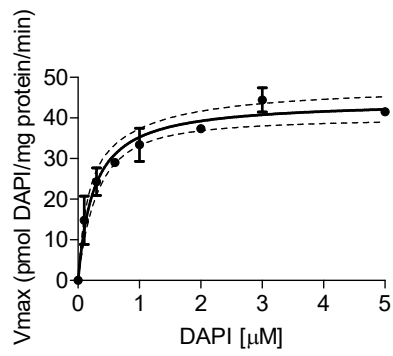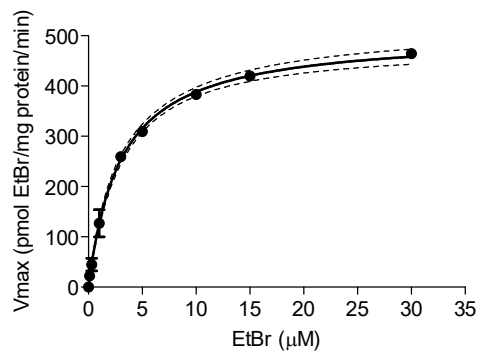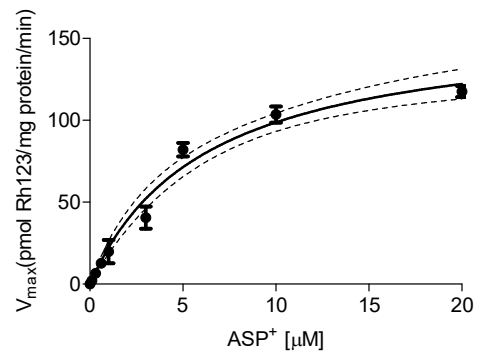

D. Mate7

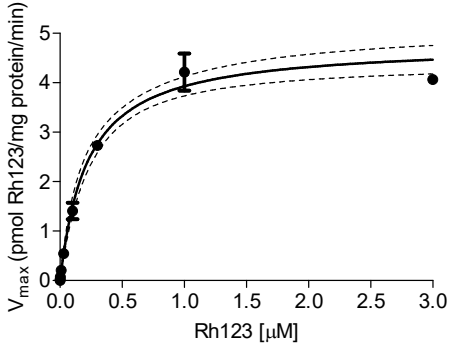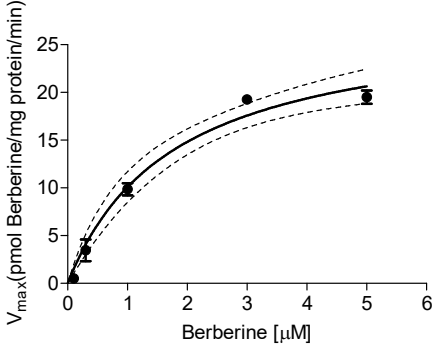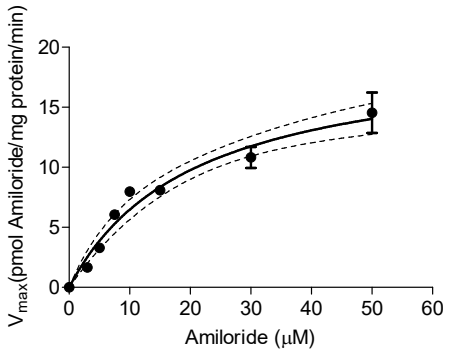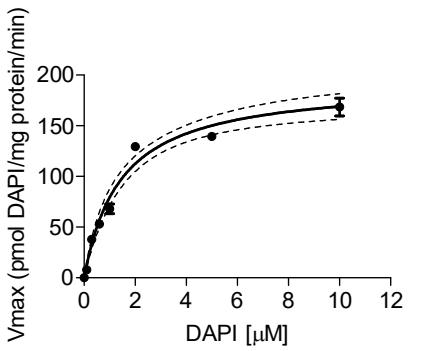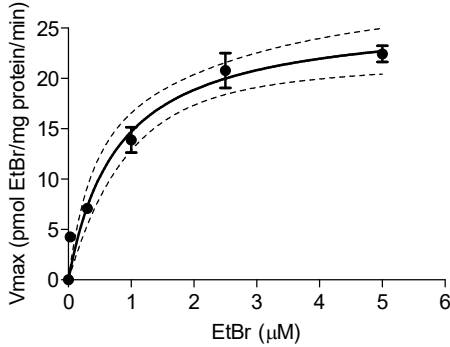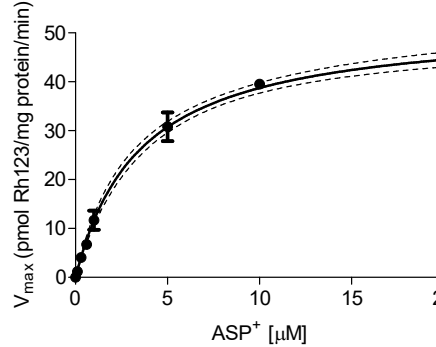

### E. Mate8

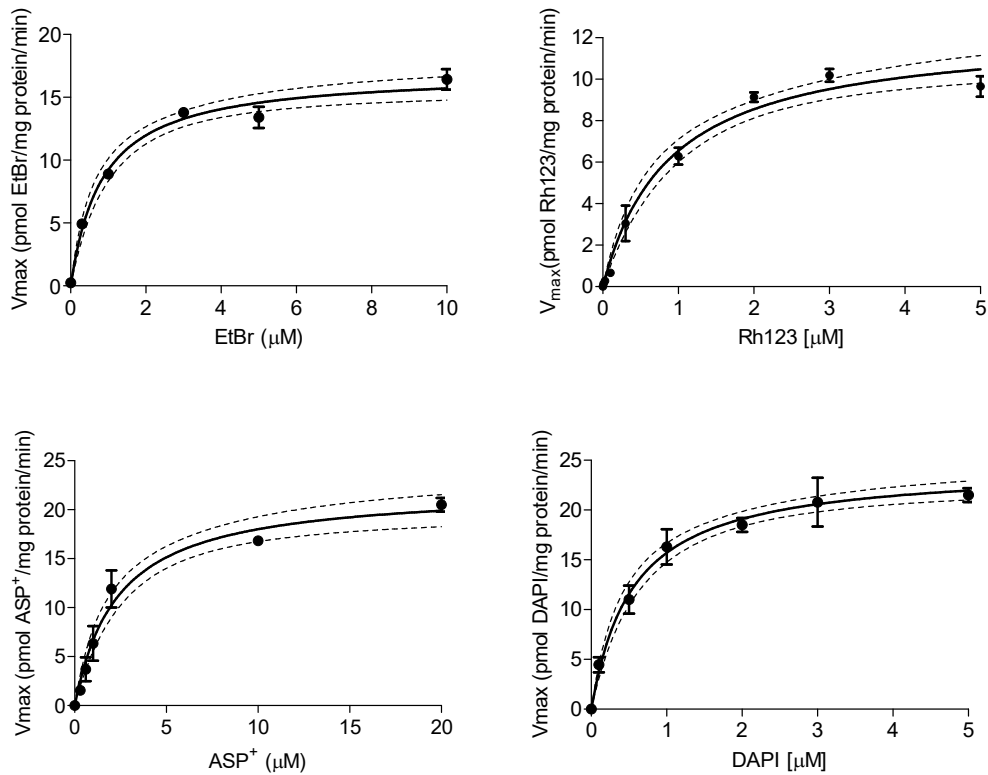

**Figure S3.** Michaelis-Menten kinetics of the uptake of fluorescent dyes: 4-(4-(dimethylamino)styryl)-N-methylpyridinium iodide (ASP<sup>+</sup>), 4',6-diamidino-2-phenylindole (DAPI), rhodamine 123 (Rh123), ethidium bromide (EtBr), berberine and amiloride by zebrafish Mates: **A**, Mate3; **B**, Mate4; **C**, Mate6; **D**, Mate7 and **E**, Mate8. Concentration dependence of dye uptake expressed as transport rate (pmol/mg protein/min) over dye concentration (μM) after/during 5 min incubation with the dye except with the DAPI where kinetics for 5-10 min was measured. The uptake into vector-transfected HEK293 cells (mock cells) was subtracted to obtain transporter-specific uptake and data were fitted in the GraphPad Prism 5. Each value represents the mean  $\pm$  SD from triplicate determinations of a representative experiment.

Figure S4.

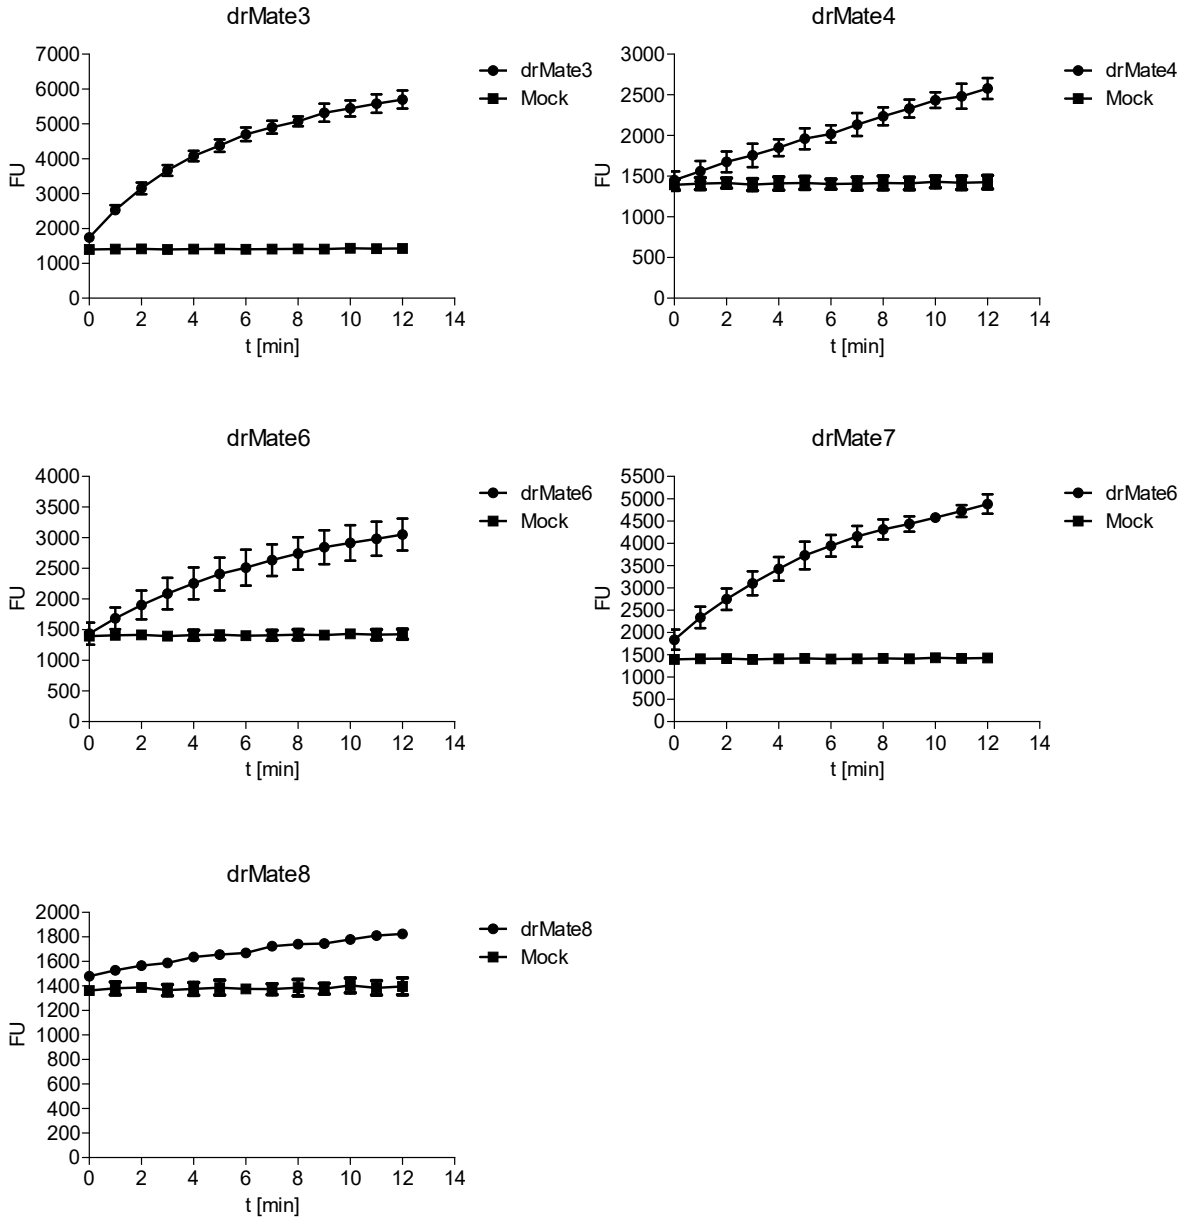

Figure S4. Time response curves for 1.0  $\mu$ M DAPI (Mate4, Mate6 and Mate8) and 2.5  $\mu$ M DAPI (Mate3 and Mate7).

Figure S5.

A. MPP+

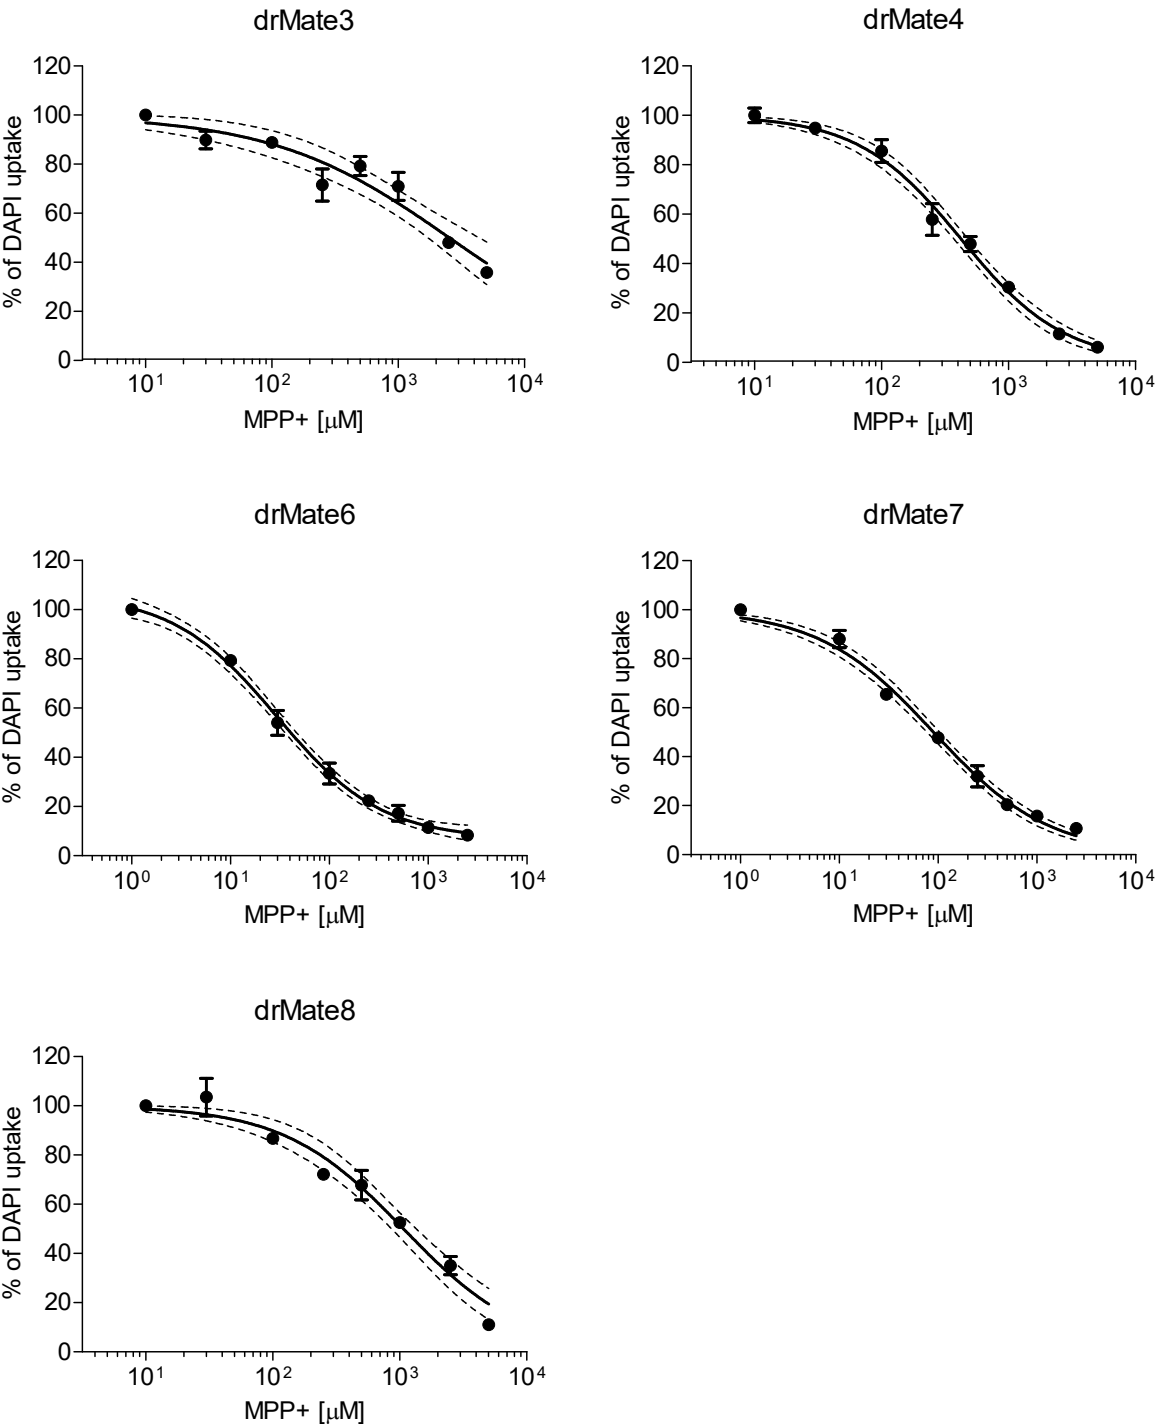

**B. TEA**

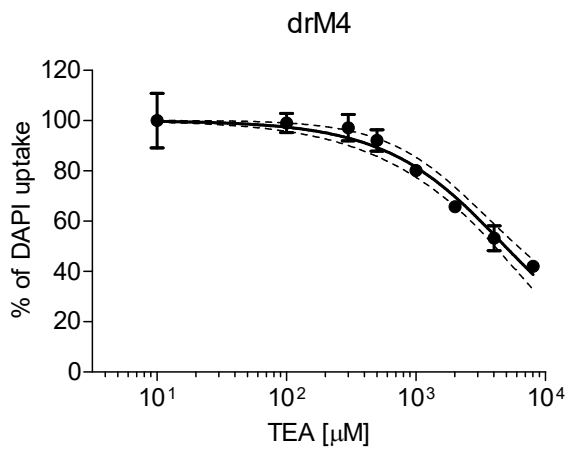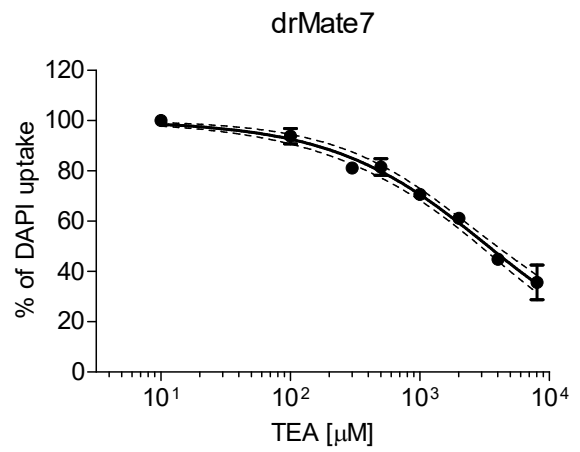

**C. DHEAS**

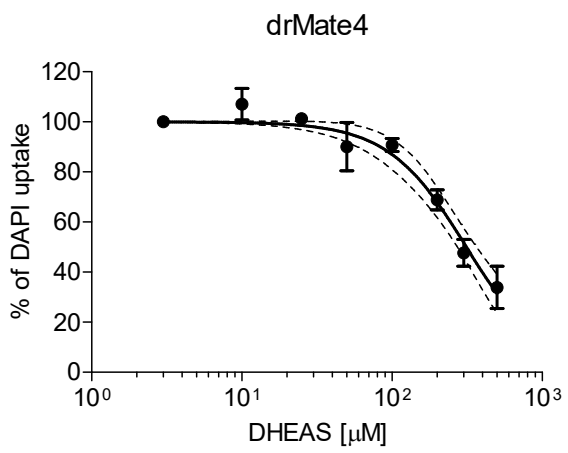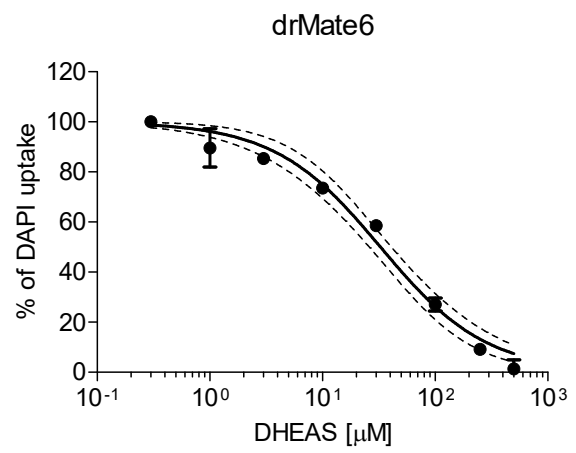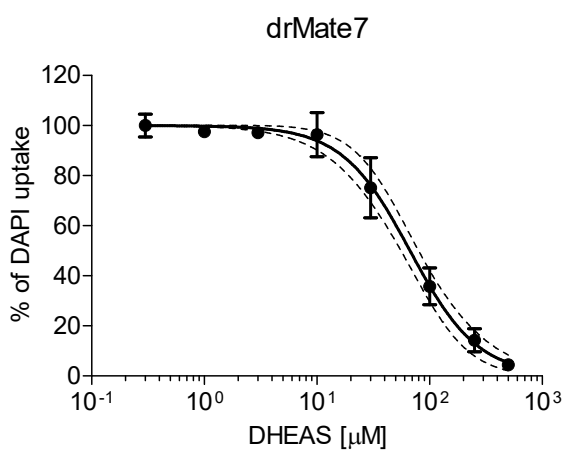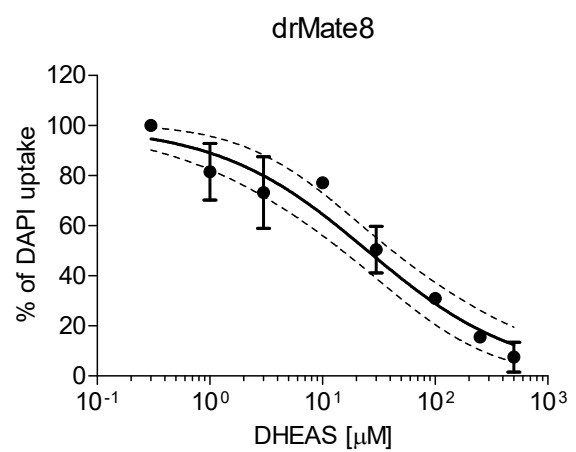

D. Testosterone

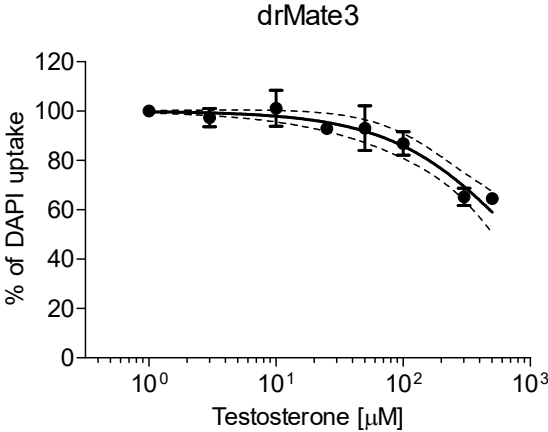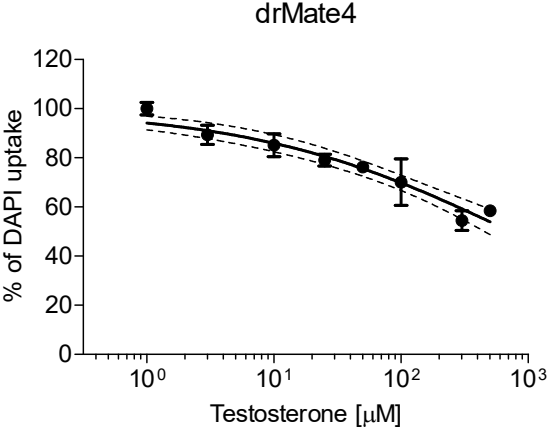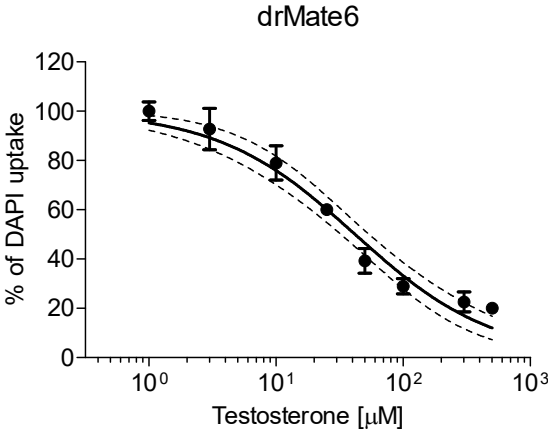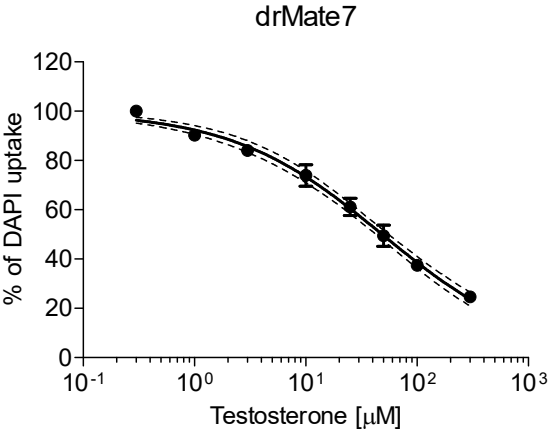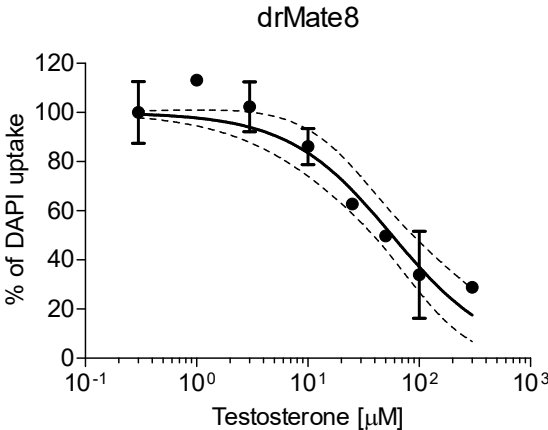



### E. Androstenedione

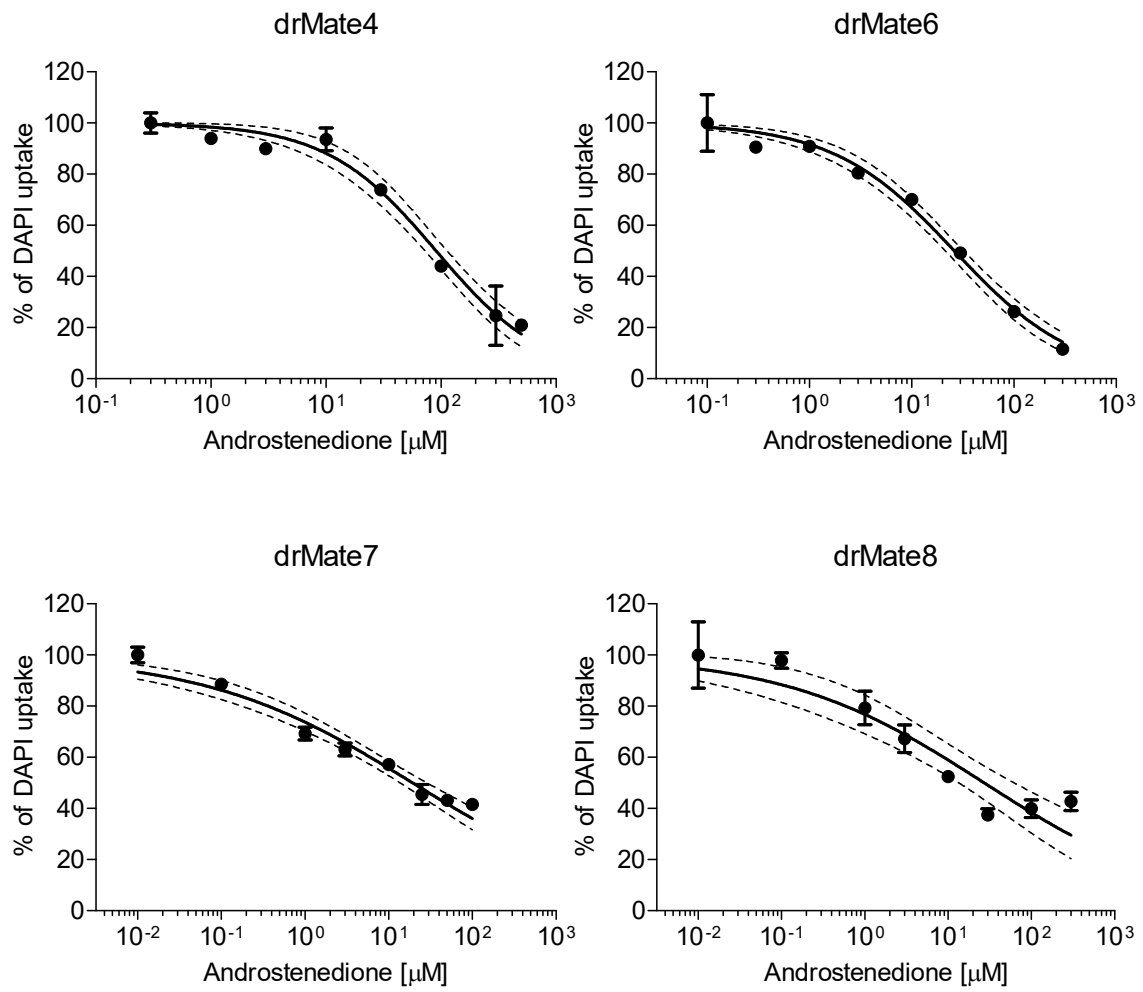

### F. Deoxycholate

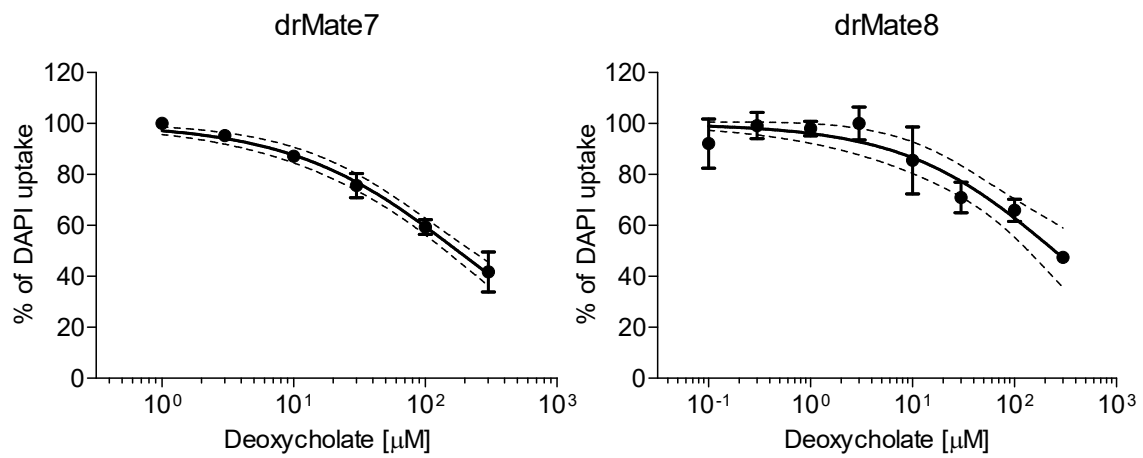

### G. Corticosterone

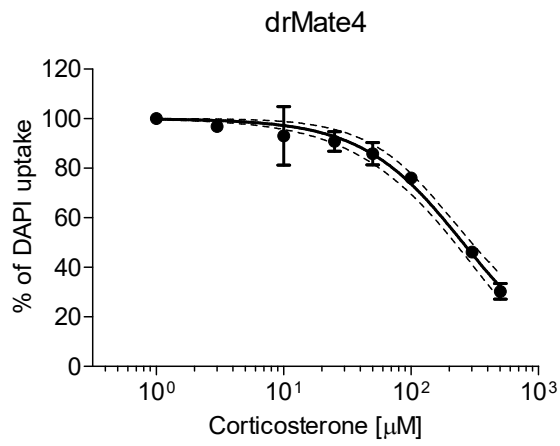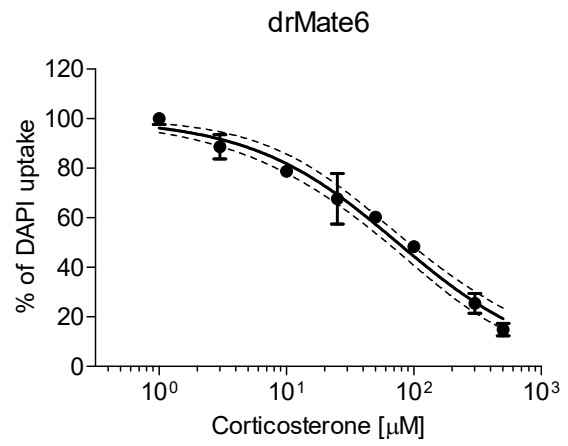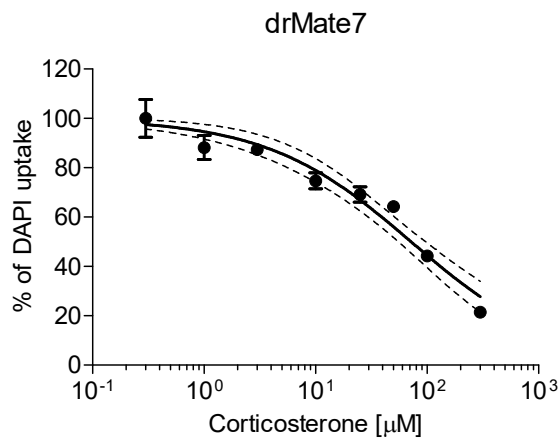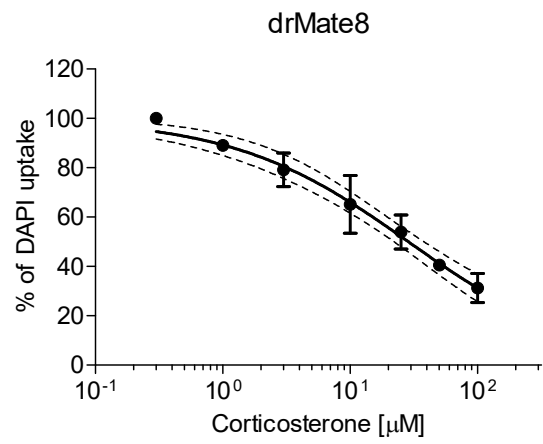

### H. Thiamine

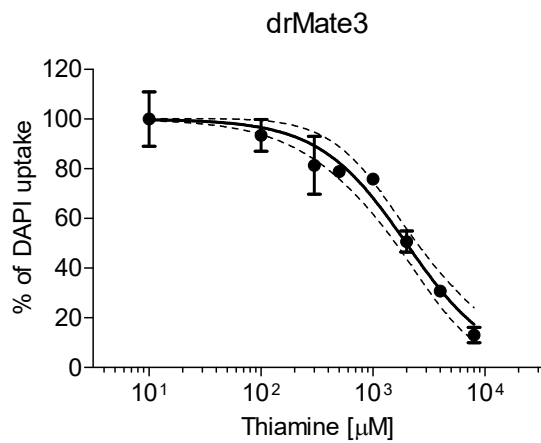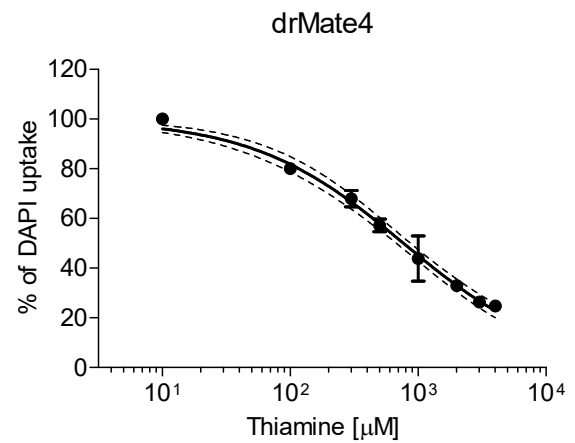

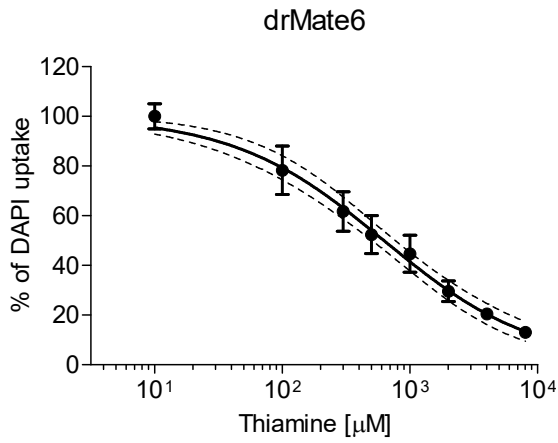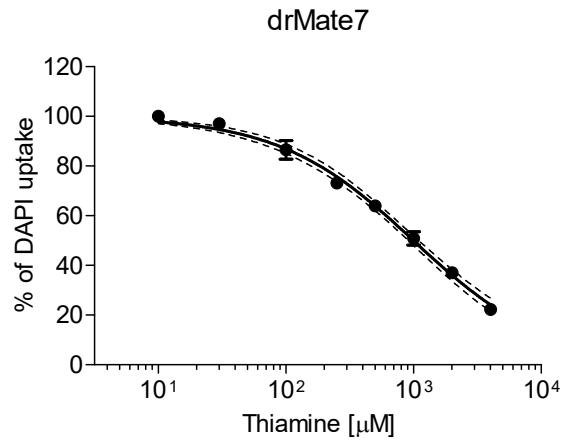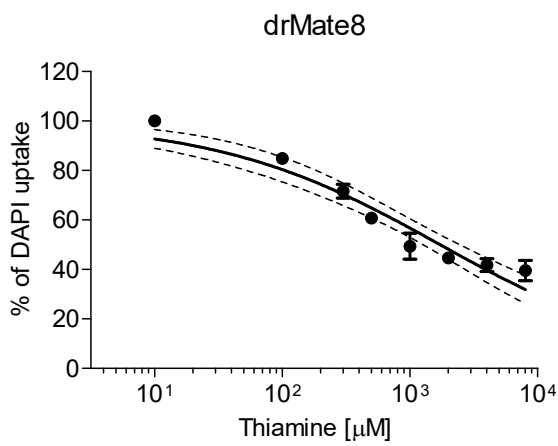

I. Cimetidine

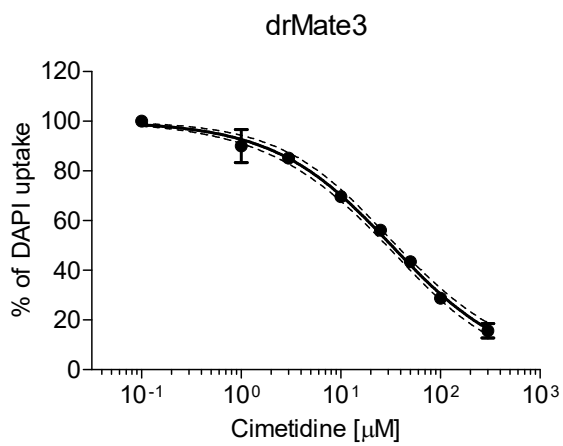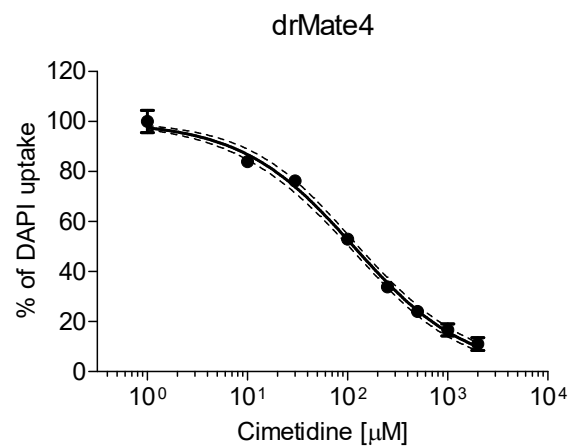

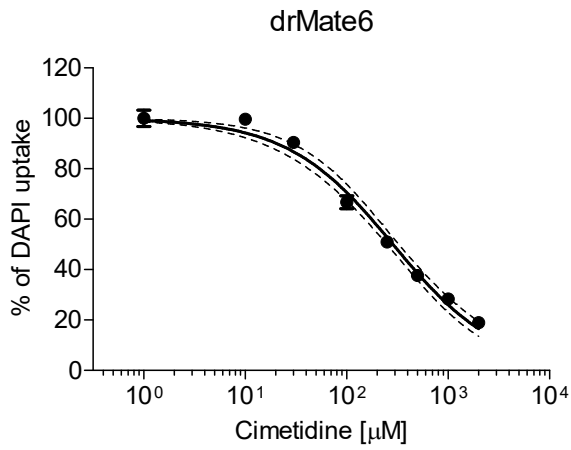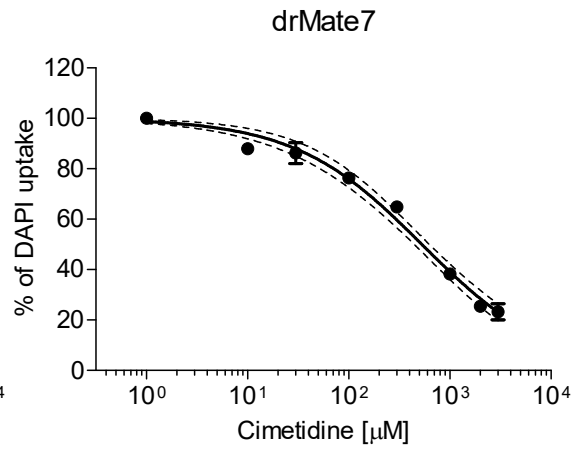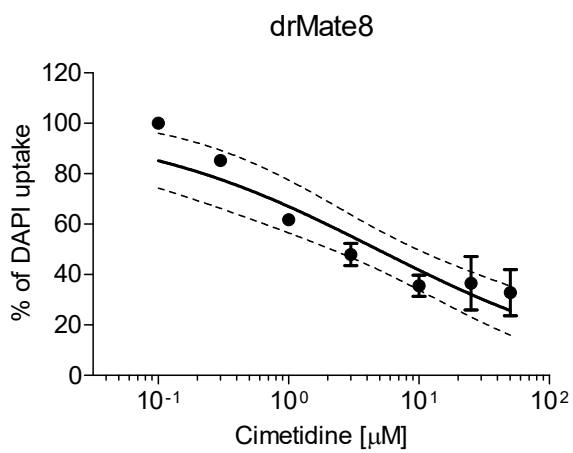

## J. Verapamil

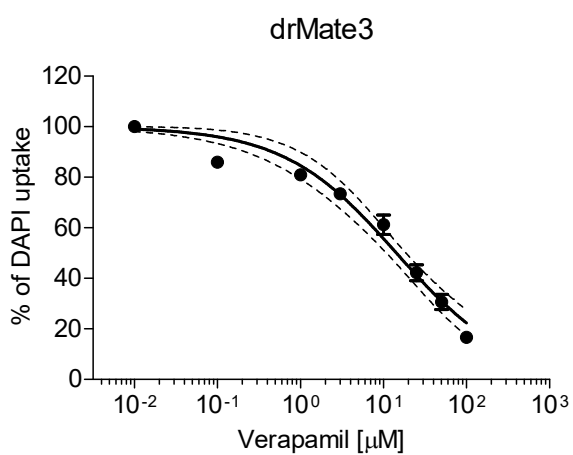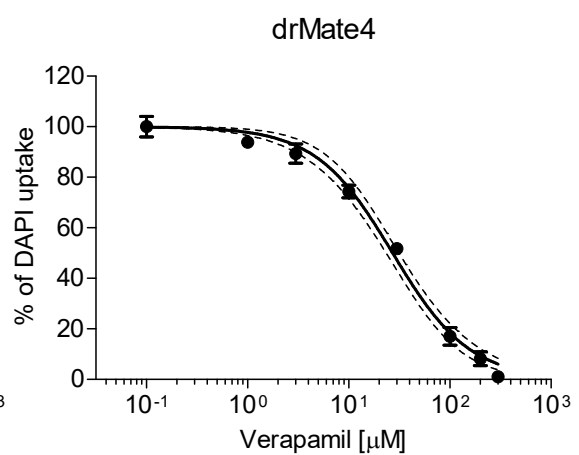

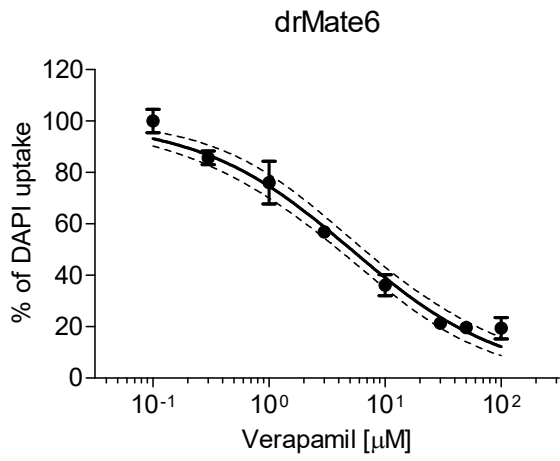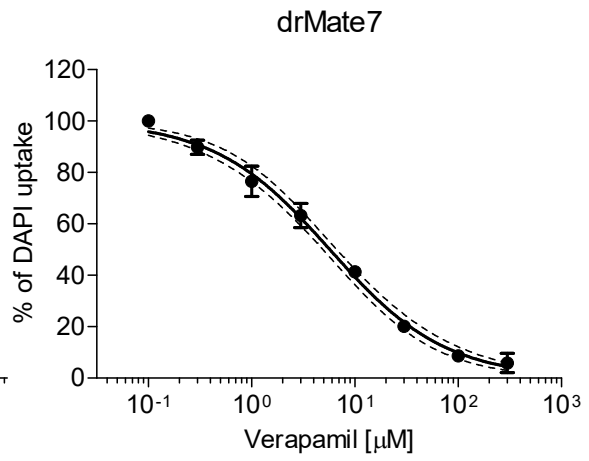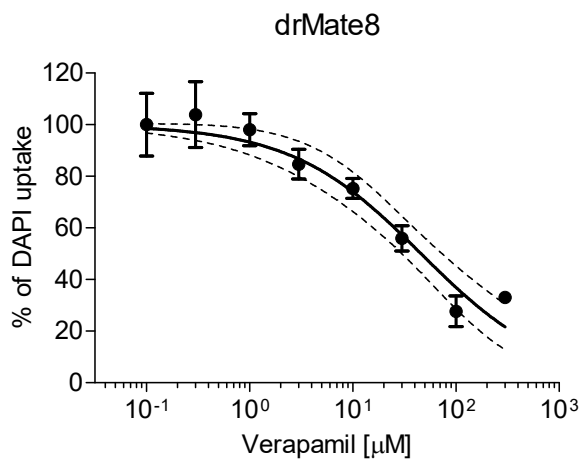

K. Quinidine

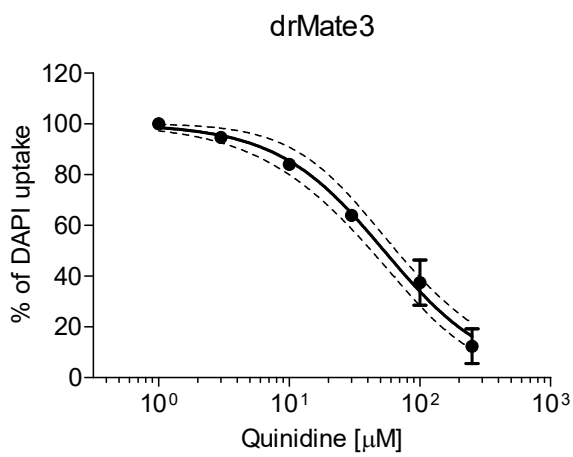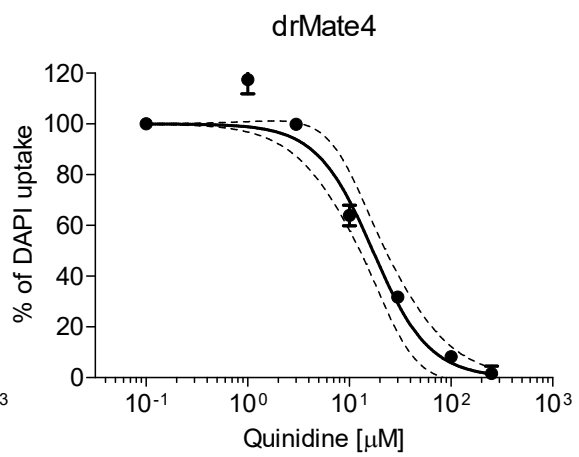

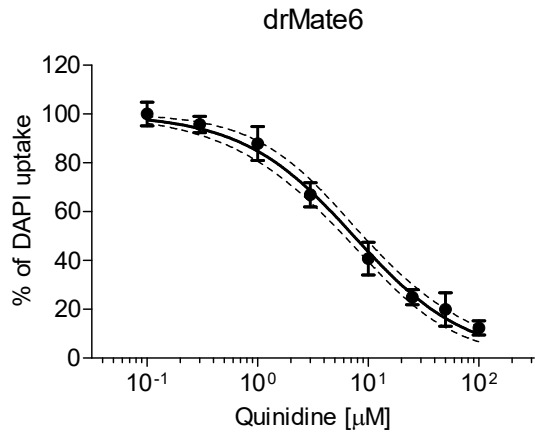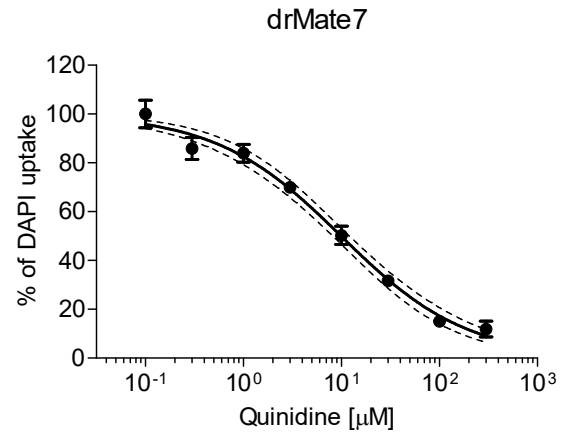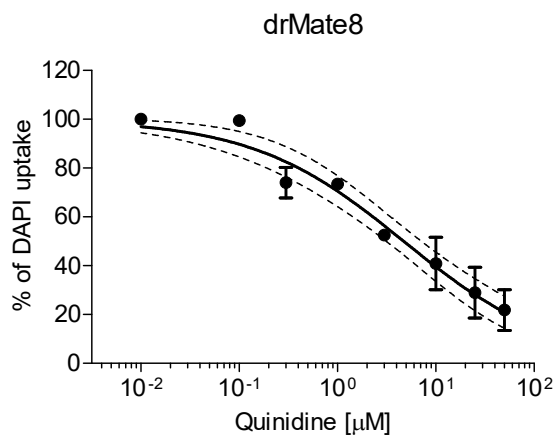

L. Paraquat

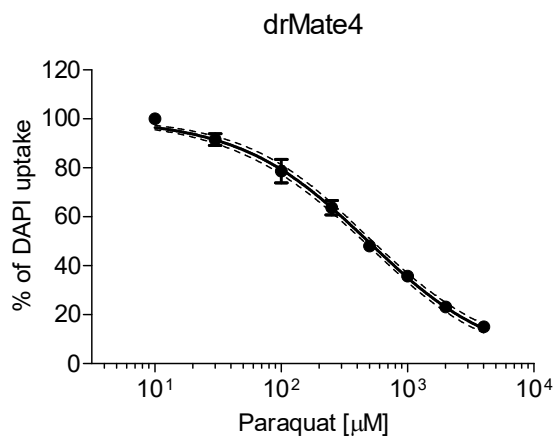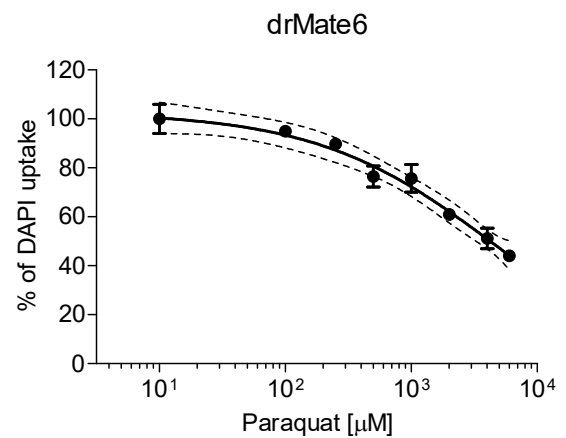

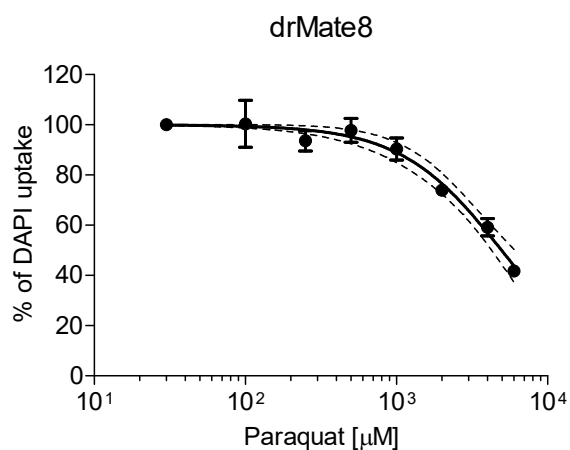

**Figure S5.** Concentration dependent inhibition of Mate mediated 4',6-diamidino-2-phenylindole (DAPI) uptake by typical interactors of mammalian MATEs: **A**, MPP+; **B**, TEA; **C**, DHEAS; **D**, Testosterone; **E**, Androstenedione; **F**, Deoxycholate; **G**, Corticosterone; **H**, Thiamine; **I**, Cimetidine; **J**, Veramil; **K**, Quinidine; **L**, Paraquat. The specific uptake of DAPI is expressed as a percentage relative to the DAPI uptake in the absence of an interactor (which is set to 100 %). For the  $IC_{50}$  calculations data were fitted to the sigmoidal four parameters dose–response model (variable slope) in the GraphPad Prism 5. Each data point represents the mean  $\pm$  SD from triplicate determinations of a representative experiment.
